# Supplementary material
Source: PubMed Central journal article supplement (PMC4580608)
Supplement: supp_dc15-0765v150765_DC150765SupplementaryData.pdf [file supp_dc15-0765v150765_DC150765SupplementaryData.pdf]

SUPPLEMENTARY DATA

**Supplementary Table 1.** Scores on self report inventories.

| Inventory                             | Score range                            | Pre-intervention | Post-intervention | <i>t</i> (df),<br><i>p</i> value       | Cohen's <i>d</i><br>effect size |
|---------------------------------------|----------------------------------------|------------------|-------------------|----------------------------------------|---------------------------------|
| Diabetes Quality<br>Of Life for Youth | 1=Very unsatisfied<br>5=Very satisfied | 3.8 ± 0.6        | 4.2 ± 0.6         | <i>t</i> (7) = 1.96,<br><i>p</i> = .09 | 0.67                            |
| Problem Areas In<br>Diabetes          | 1=Not a problem<br>6=Serious problem   | 2.4 ± 1.2        | 1.7 ± 0.7         | <i>t</i> (6) = 2.52,<br><i>p</i> = .04 | 0.71                            |
| Diabetes<br>Empowerment<br>Scale      | 1=Not at all sure<br>5=Completely sure | 3.4 ± 0.6        | 4.0 ± 0.7         | <i>t</i> (7) = 1.96,<br><i>p</i> = .09 | 0.92                            |

Values represent means and standard deviations. One subject was removed from analyses of Problem Areas In Diabetes scores due to extremely high ratings.

SUPPLEMENTARY DATA

**Supplementary Table 2.** Subject and parent responses to items on the study satisfaction survey.

| Item and responses                                                                                     | Subjects | Parents  |
|--------------------------------------------------------------------------------------------------------|----------|----------|
| Overall, how satisfied are you with the intervention?                                                  |          |          |
| Very dissatisfied                                                                                      | 0 (0.0)  | 0 (0.0)  |
| Moderately dissatisfied                                                                                | 1 (12.5) | 0 (0.0)  |
| Neither satisfied nor dissatisfied                                                                     | 0 (0.0)  | 0 (0.0)  |
| Moderately satisfied                                                                                   | 3 (37.5) | 1 (14.3) |
| Very satisfied                                                                                         | 4 (50.0) | 6 (85.7) |
| How well do you feel the intervention helped you (your child) increase the regularity of sugar checks? |          |          |
| Not at all                                                                                             | 0 (0.0)  | 0 (0.0)  |
| Very little                                                                                            | 0 (0.0)  | 1 (14.3) |
| Somewhat                                                                                               | 1 (12.5) | 0 (0.0)  |
| Quite a bit                                                                                            | 4 (50.0) | 1 (14.3) |
| Extremely                                                                                              | 3 (37.5) | 5 (71.4) |
| How much did the intervention help you (your child) improve overall management of diabetes?            |          |          |
| Not at all                                                                                             | 0 (0.0)  | 0 (0.0)  |
| Very little                                                                                            | 0 (0.0)  | 0 (0.0)  |
| Somewhat                                                                                               | 1 (12.5) | 1 (14.3) |
| Quite a bit                                                                                            | 5 (62.5) | 3 (42.9) |
| Extremely                                                                                              | 2 (25.0) | 3 (42.9) |
| *What was the most useful part of the intervention?                                                    |          |          |
| Helped me/my child manage diabetes better/reduce A1c                                                   | 4 (50.0) | 4 (42.9) |
| Helped me/my child test more (rewards not explicitly mentioned)                                        | 2 (25.0) | 2 (28.7) |
| Rewards for testing                                                                                    | 1 (12.5) | 1 (14.3) |

## SUPPLEMENTARY DATA

|                                                                       |          |          |
|-----------------------------------------------------------------------|----------|----------|
| Reminders to test                                                     | 1 (12.5) | 0 (0.0)  |
| *What was the least useful part of the intervention?                  |          |          |
| Expectations related to texting after testing                         | 3 (37.5) | 1 (14.3) |
| The intervention only helped improve testing (not insulin/exercising) | 1 (12.5) | 1 (14.3) |
| Nothing, all was useful                                               | 4 (50.0) | 5 (71.5) |
| *Do you have any suggestions for improving the intervention?          |          |          |
| Remove texting expectations                                           | 1 (12.5) | 0 (0.0)  |
| Increase reinforcement amount for testing                             | 1 (12.5) | 0 (0.0)  |
| Reinforce taking insulin                                              | 1 (12.5) | 0 (0.0)  |
| Improve technological problems with uploading                         | 0 (0.0)  | 1 (12.5) |
| Add more in-person visits                                             | 0 (0.0)  | 1 (12.5) |
| Nothing, it was good/perfect as was                                   | 5 (62.5) | 5 (71.5) |

\* These questions were open ended, and responses were categorized based on themes. Values represent n's (%).
